# Supplementary material for: Structural Insight into the Rotational Switching Mechanism of the Bacterial Flagellar Motor
Source: PubMed Central journal article supplement (PMC3091841; doi:10.1371/journal.pbio.1000616), 2011-05-10
Supplement: pbio.1000616.s004.pdf [file pbio.1000616.s004.pdf]

---

|                             | Native              | Os-derivative       |
|-----------------------------|---------------------|---------------------|
| Space group                 | $P6_2$              |                     |
| Cell dimensions             |                     |                     |
| a, b, c (Å)                 | 93.15, 93.15, 48.39 | 92.47, 92.47, 47.81 |
| $\alpha, \beta, \gamma$ (°) | 90, 90, 120         | 90, 90, 120         |
| Wavelength (Å)              | 1.00000             | 1.13987             |
| Resolution (Å)              | 42.0-2.3 (2.42-2.3) | 48.0-3.2 (3.37-3.2) |
| $R_{merge}$                 | 6.5 (33.6)          | 10.2 (37.0)         |
| I/ $\sigma$ I               | 21.3 (5.3)          | 17.1 (6.2)          |
| Completeness (%)            | 97.9 (97.9)         | 99.7 (99.7)         |
| Redundancy                  | 6.2 (6.3)           | 5.8 (6.0)           |

---
