# Supplementary material for: Structural Insight into the Rotational Switching Mechanism of the Bacterial Flagellar Motor
Source: PubMed Central journal article supplement (PMC3091841; doi:10.1371/journal.pbio.1000616), 2011-05-10
Supplement: pbio.1000616.s005.pdf [file pbio.1000616.s005.pdf]

---

|                         |                       |
|-------------------------|-----------------------|
| Resolution (Å)          | 33.6-2.3 (2.44-2.3)   |
| $R_{work}/R_{free}$     | 22.4/23.9 (25.1/30.4) |
| No. atoms               |                       |
| Protein                 | 1679                  |
| Water                   | 114                   |
| B-factors               |                       |
| Protein                 | 48.8                  |
| Water                   | 65.9                  |
| R.m.s. deviations       |                       |
| Bond lengths (Å)        | 0.008                 |
| Bond angles (°)         | 1.3                   |
| Ramachandran plot (%)   |                       |
| Most favored            | 96.4                  |
| Additionally<br>allowed | 3.6<br>0              |
| Generously allowed      | 0                     |
| Disallowed              |                       |

---
